# Supplementary material
Source: publisher figshare collection journal article supplement (https://karger.figshare.com/ndownloader/files/17602223)
Supplement: Supplementary file 1 [file 17602223]

**Supplementary Table 1.**

|                             |            | Entire cohort                 | HC                           | CHD                           | p-value           |
|-----------------------------|------------|-------------------------------|------------------------------|-------------------------------|-------------------|
| Vascular adhesion molecules | N          | 34                            | 11                           | 23                            |                   |
|                             | ICAM       | 148.6 (SD 79.7)               | 117.2 (SD 50.2)              | 163.7 (SD 87.5)               | 0.113             |
|                             | VCAM       | <b>1124.9 (837.1; 1396.0)</b> | <b>965.5 (811.3; 1104.4)</b> | <b>1256.8 (997.4; 1495.5)</b> | <b>0.049*</b>     |
|                             | E-selectin | 110958.6 (SD 45825.7)         | 108634.2 (SD 43544.0)        | 112070.2 (SD 47792.7)         | 0.842             |
|                             | P-selectin | 97.0 (SD 30.9)                | 101.7 (SD 29.2)              | 94.7 (SD 32.0)                | 0.547             |
| Cytokines                   | N          | 33                            | 11                           | 22                            |                   |
|                             | TNF-alpha  | <b>0.05 (0; 1.33)</b>         | <b>0</b>                     | <b>0.85 (0.05; 1.71)</b>      | <b>&lt;0.001*</b> |
|                             | IL-6       | <b>1.59 (1.0; 2.3)</b>        | <b>1.04 (0.9; 1.6)</b>       | <b>1.82 (1.3; 2.8)</b>        | <b>0.010*</b>     |
|                             | IL-8       | 0.58 (0; 1.6)                 | 0.73 (0; 1.8)                | 0.51 (0; 1.5)                 | 0.846             |
| Vascular Growth Factors     | N          | 34                            | 11                           | 23                            |                   |
|                             | VEGF-A     | 52.4 (SD 14.4)                | 57.5 (SD 12.5)               | 49.9 (SD 14.9)                | 0.152             |
|                             | VEGF-C     | <b>28.2 (0; 85.8)</b>         | <b>64.5 (29.8; 139.6)</b>    | <b>17.3 (0; 75.7)</b>         | <b>0.041*</b>     |
|                             | PIGF       | 10.6 (6.6; 21.7)              | 12.7 (6.6; 15.6)             | 10.0 (6.4; 29.8)              | 0.971             |
|                             | VEGFR1     | 60.8 (SD 32.4)                | 75.8 (SD 25.9)               | 53.7 (SD 33.3)                | 0.062             |

Continuous variables with normal distribution are presented as means and standard deviations (SD) while variables with skewed distribution as medians with 25<sup>th</sup> and 75<sup>th</sup> percentile values. Group comparison for normally distributed, continuous variable was performed using t-test while comparison for skewed variables was performed using the Mann-Whitney. CKD= chronic kidney disease, HC= healthy controls, ICAM= intracellular adhesion molecule, IL= interleukin, PIGF= placental growth factor, TNF= tumour necrosis factor, VCAM= vascular cell adhesion molecule, VEGF= vascular endothelial growth factor, VEGFR1= VEGF receptor 1. \* indicates significance of p-value <0.05.

**Supplementary Table 2.**

| OH/ECW                      |            | r             | p-value       |
|-----------------------------|------------|---------------|---------------|
| MRI Sodium                  | N          | 20            |               |
|                             | Muscle     | <b>0.627</b>  | <b>0.003*</b> |
|                             | SC         | <b>0.627^</b> | <b>0.003*</b> |
| Vascular adhesion molecules | N          | 23            |               |
|                             | ICAM       | 0.188         | 0.389         |
|                             | VCAM       | 0.179         | 0.415         |
|                             | E-selectin | <b>-0.520</b> | <b>0.011*</b> |
|                             | P-selectin | 0.163         | 0.457         |
| Cytokines                   | N          | 22            |               |
|                             | TNF-alpha  | -0.011^       | 0.962         |
|                             | IL-6       | -0.089^       | 0.593         |
|                             | IL-8       | <b>0.509^</b> | <b>0.016*</b> |
| Vascular Growth Factors     | N          | 23            |               |
|                             | VEGF-A     | -0.125        | 0.578         |
|                             | VEGF-C     | 0.158^        | 0.481         |
|                             | PIGF       | 0.037^        | 0.868         |
|                             | VEGFR1     | -0.087        | 0.692         |

The relationship between variables was assessed using Pearson's correlation for normally distributed variables and Spearman's correlation when distribution was skewed. ECW= extracellular water, ICAM= intracellular adhesion molecule, IL= interleukin, MRI= magnetic resonance imaging, Na= Sodium, OH= overhydration index, PIGF= placental growth factor, SC= subcutaneous tissue, TNF= tumour necrosis factor, VCAM= vascular cell adhesion molecule, VEGF= vascular endothelial growth factor, VEGFR1= VEGF receptor 1. ^ denotes Spearman's correlation coefficient, \* indicates significance of p-value <0.05,

**Supplementary Table 3.**

| MRI-derived Na Muscle       |            | r       | p-value |
|-----------------------------|------------|---------|---------|
| Vascular adhesion molecules | N          | 20      |         |
|                             | ICAM       | 0.302   | 0.195   |
|                             | VCAM       | 0.150   | 0.528   |
|                             | E-selectin | -0.294  | 0.209   |
|                             | P-selectin | -0.031  | 0.898   |
| Cytokines                   | N          | 20      |         |
|                             | TNF-alpha  | 0.109^  | 0.648   |
|                             | IL-6       | -0.019^ | 0.937   |
|                             | IL-8       | 0.025^  | 0.918   |
| Vascular Growth Factors     | N          | 20      |         |
|                             | VEGF-A     | -0.081  | 0.763   |
|                             | VEGF-C     | -0.111^ | 0.640   |
|                             | PlGF       | -0.156^ | 0.510   |
|                             | VEGFR1     | -0.126  | 0.595   |

The relationship between variables was assessed using Pearson's correlation for normally distributed variables and Spearman's correlation when distribution was skewed. ICAM= intracellular adhesion molecule, IL= interleukin, MRI= magnetic resonance imaging, Na= sodium, PlGF= placental growth factor, TNF= tumour necrosis factor, VCAM= vascular cell adhesion molecule, VEGF= vascular endothelial growth factor, VEGFR1= VEGF receptor 1. ^ denotes Spearman's correlation coefficient, \* indicates significance of p-value <0.05,

**Supplementary Table 4.**

| MRI-derived Na SC           |            | r             | p-value       |
|-----------------------------|------------|---------------|---------------|
| Vascular adhesion molecules | N          | 20            |               |
|                             | ICAM       | <b>0.535^</b> | <b>0.015*</b> |
|                             | VCAM       | 0.278^        | 0.235         |
|                             | E-selectin | -0.053^       | 0.826         |
|                             | P-selectin | 0.412^        | 0.071         |
| Cytokines                   | N          |               |               |
|                             | TNF-alpha  | 0.186^        | 0.432         |
|                             | IL-6       | 0.164^        | 0.489         |
|                             | IL-8       | 0.195^        | 0.409         |
| Vascular Growth Factors     | N          | 20            |               |
|                             | VEGF-A     | -0.002^       | 0.995         |
|                             | VEGF-C     | -0.320^       | 0.169         |
|                             | PlGF       | 0.147^        | 0.535         |
|                             | VEGFR1     | 0.132^        | 0.579         |

The relationship between variables was assessed using Pearson's correlation for normally distributed variables and Spearman's correlation when distribution was skewed. ICAM= intracellular adhesion molecule, IL= interleukin, MRI= magnetic resonance imaging, Na= Sodium, PlGF= placental growth factor, SC= subcutaneous tissue, TNF= tumour necrosis factor, VCAM= vascular cell adhesion molecule, VEGF= vascular endothelial growth factor, VEGFR1= VEGF receptor 1. ^ denotes Spearman's correlation coefficient, \* indicates significance of p-value <0.05.
